# Supplementary material for: Unraveling the critical role of Zn-phyllomanganates in zinc ion batteries
Source: Royal Society of Chemistry journal article supplement (doi:10.1039/d1ta03536c), 2021-01-01
Supplement: d1ta03536c1.pdf [file d1ta03536c1.pdf]

*Supplementary information for*

**Unraveling the critical role of Zn-phyllomanganates in  
zinc ion batteries**

Boeun Lee,<sup>‡a</sup> Jihwan Choi,<sup>‡a</sup> Minseok Lee,<sup>a</sup> Seulki Han,<sup>a</sup> Minji Jeong,<sup>a</sup> Taeun Yim,<sup>b</sup> and Si  
Hyoung Oh<sup>\*ac</sup>

<sup>a</sup>*Centre for Energy Storage Research, Korea Institute of Science and Technology  
5, Hwarang-ro 14-gil, Seongbuk-gu, Seoul, 02792, Republic of Korea.*

<sup>b</sup>*Department of Chemistry, Incheon National University  
119, Academy-ro, Yeonsu-gu, Incheon, 22012, Republic of Korea*

<sup>c</sup>*Division of Energy & Environment Technology, Korea University of Science and Technology,  
Republic of Korea*

<sup>‡</sup> These authors contributed equally to this work.

This includes supplementary Fig. S1 to S8.

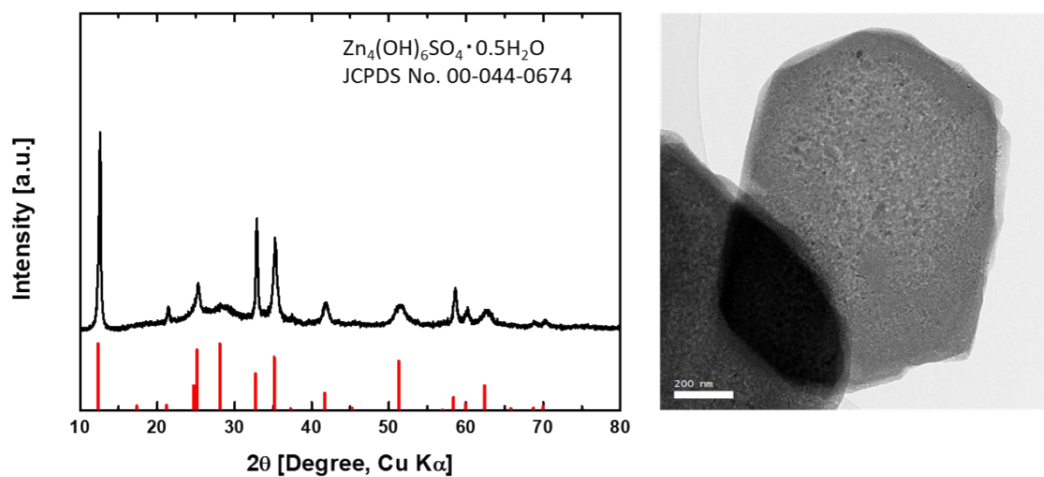

**Fig. S1** X-ray diffraction pattern and TEM image of zinc hydroxide sulfate synthesized in this work. The stick XRD pattern represents zinc hydroxide sulfate hydrate ( $Zn_4(OH)_6SO_4 \cdot 0.5H_2O$ , JCPDS No. 00-044-0674).

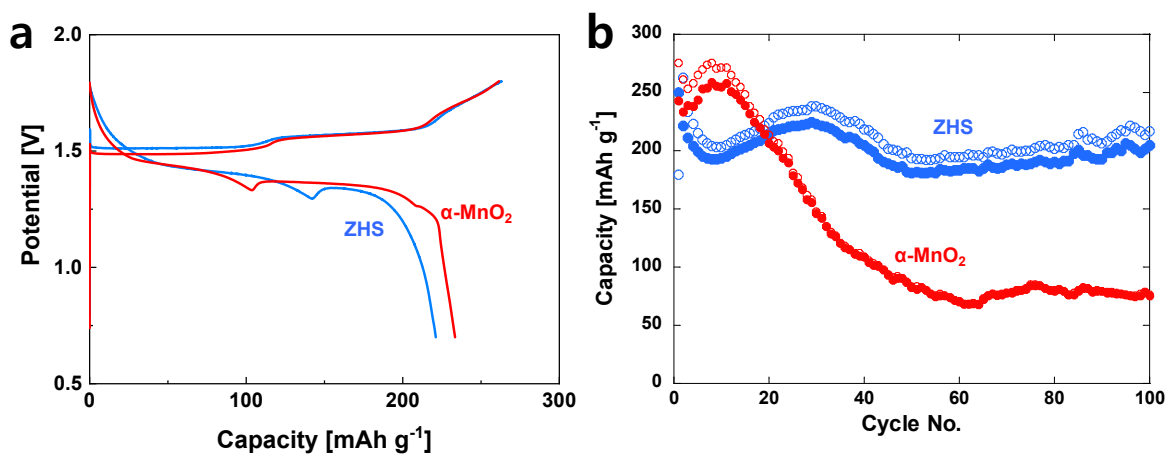

**Fig. S2** (a) Charge-discharge profiles and (b) cycling performances up to 100 cycles of the battery cells with  $\alpha$ -MnO<sub>2</sub> and zinc hydroxide sulfate hydrate (ZHS) cathode materials. The current rates applied were 70 mA g<sup>-1</sup> for ZHS, and 30.5 mA g<sup>-1</sup> for  $\alpha$ -MnO<sub>2</sub>, respectively. Open and fill circles in (b) represent the charge and discharge capacities, respectively.

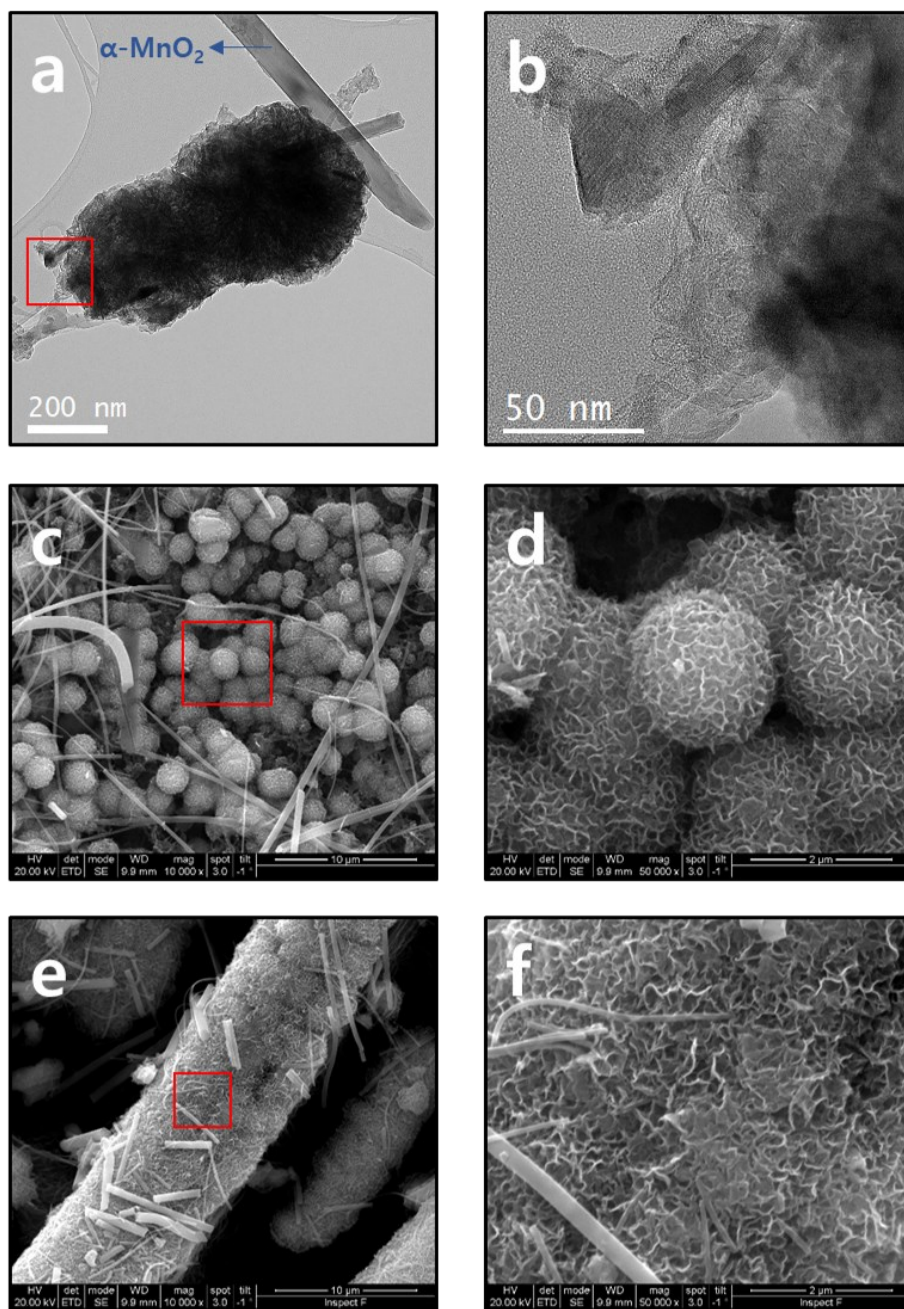

**Fig. S3** The morphology of (a), (b)  $\alpha$ -MnO<sub>2</sub>, (c), (d) ZHS and (e), (f) carbon paper after the 1<sup>st</sup> charge process. (b), (d), and (f) represent images in higher magnification centered at red square in (a), (c), and (e), respectively.

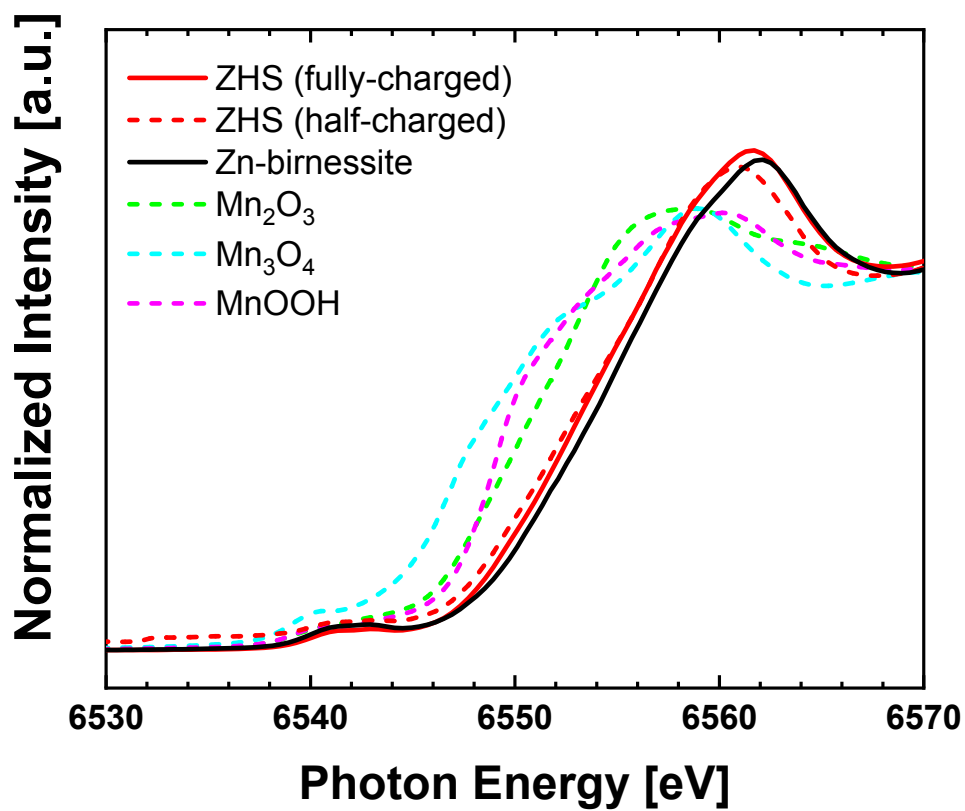

**Fig. S4** Mn K-edge X-ray absorption spectra for the half- and fully-charged electrodes for ZHS, and reference spectra for the materials of interests including Zn-birnessite, Mn<sub>2</sub>O<sub>3</sub>, Mn<sub>3</sub>O<sub>4</sub>, and MnOOH.

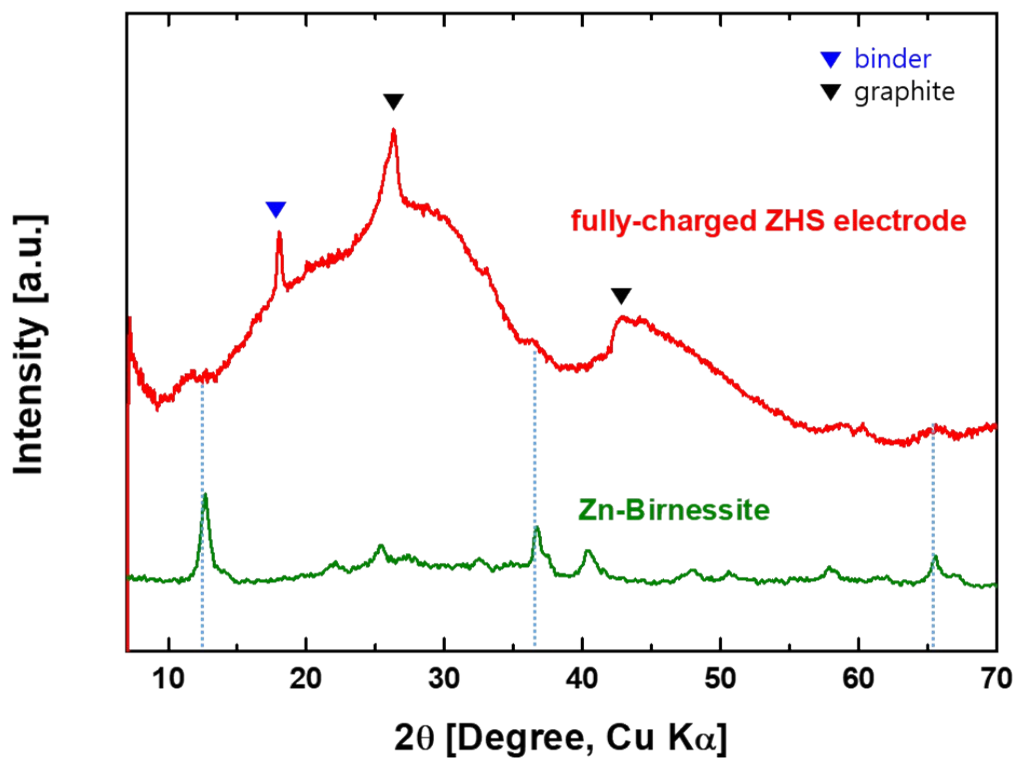

**Fig. S5** Comparison of the in-situ XRD pattern of the fully-charged ZHS electrode (red), and XRD pattern of Zn-birnessite (green). The broad peaks at  $12.7^\circ$ ,  $36.1^\circ$ , and  $65.6^\circ$  in the fully-charged ZHS electrode could be indexed to those of Zn-birnessite.

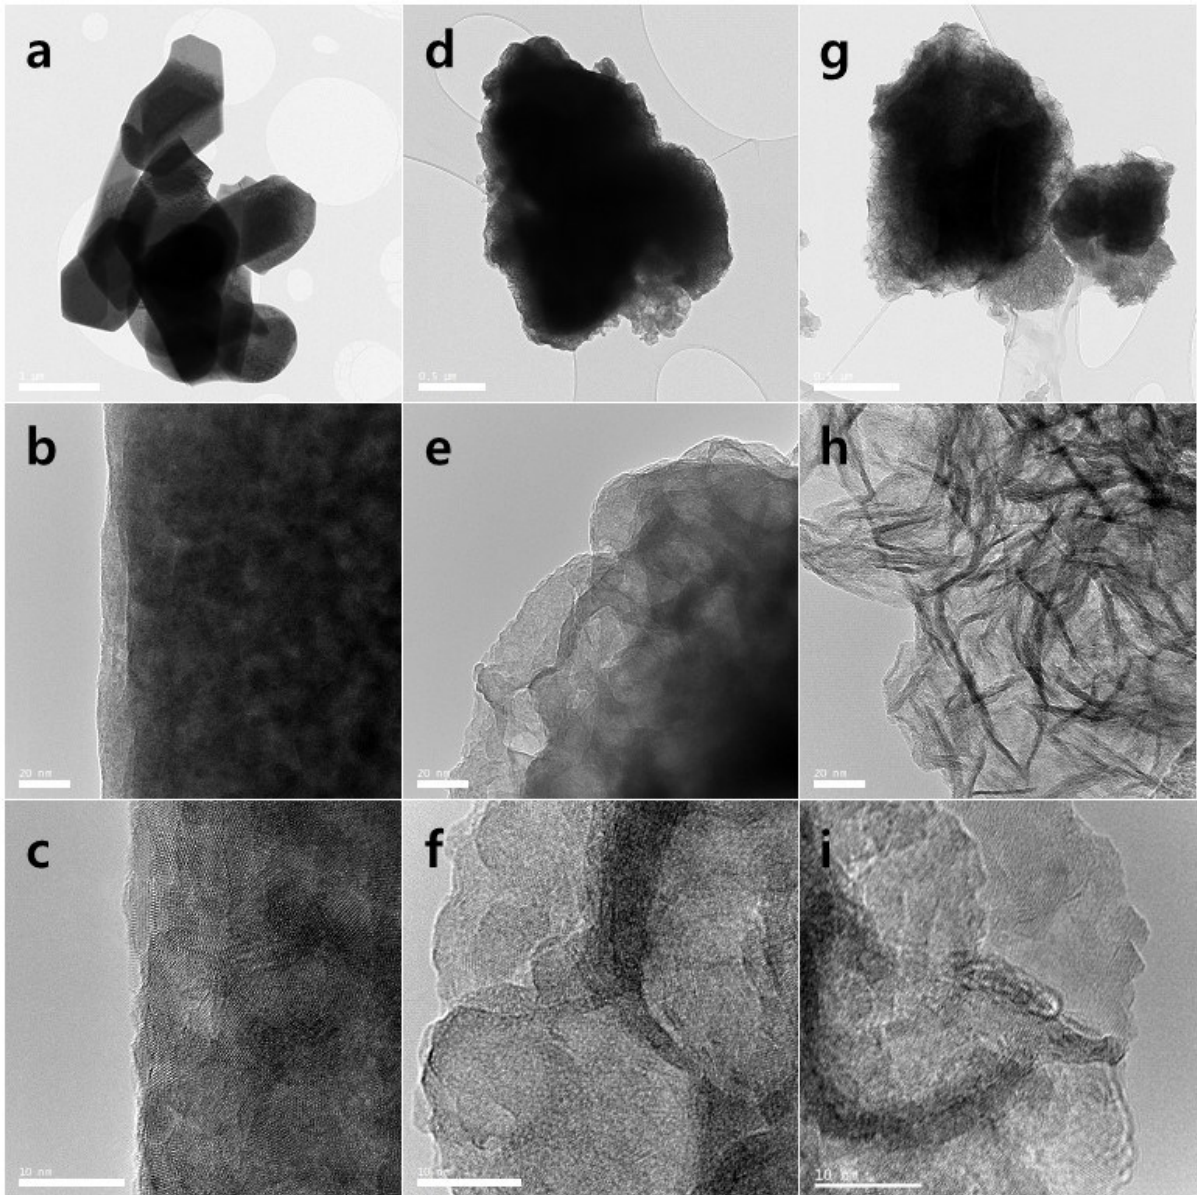

**Fig. S6** High-resolution transmission electron microscopic (HR-TEM) images for (a,b,c) the pristine ZHS synthesized, (c,d,f) products from the half-charged, and (g,h,i) the fully-charged ZHS electrodes. No distinct crystalline phases with long-range order were observed from the products in the half- and fully-charged electrodes.

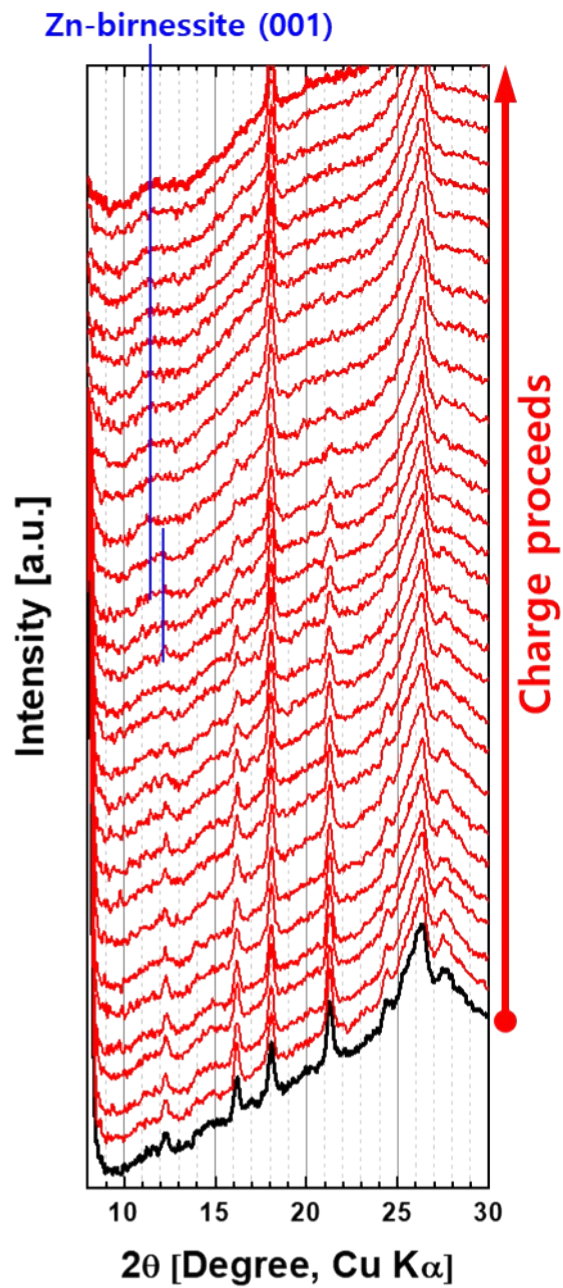

**Fig. S7** A shift of (001) reflection of Zn-phyllomanganate formed during the first charging process to lower angle from the in situ XRD patterns of ZHS electrode. This could indicate the layer expansion from 7.25 to 7.69 Å as charge proceeded.



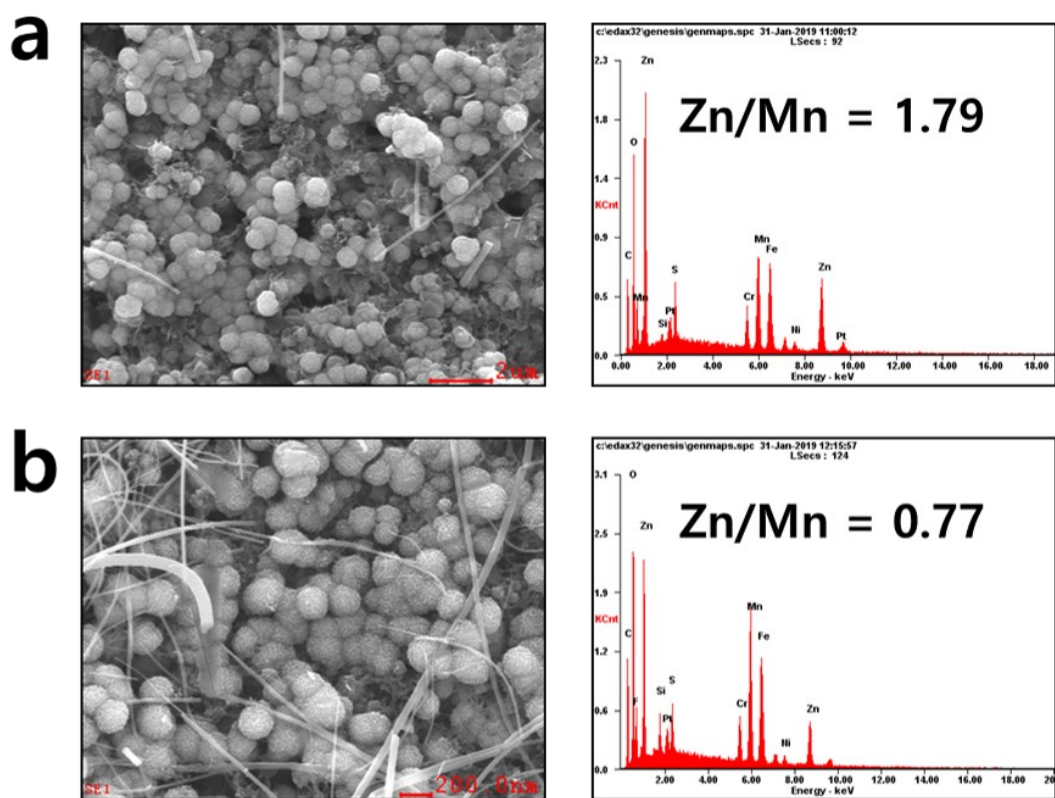

**Fig. S8** The morphology and the elemental analysis of MnO<sub>2</sub> particles in-situ formed at (a) the half- and (b) the fully-charged states.
